# Supplementary material for: Ecological and socio-economic factors affecting extinction risk in parrots
Source: Springer Nature journal article supplement (doi:10.1007/s10531-015-1036-z), 2016-01-21
Supplement: MOESM2 [file 10531_2015_1036_moesm2_esm.xlsx]

## Sheet: Sheet1
Scientific name	Common name	2014 IUCN Red List Category	Country	Presence	Origin
Agapornis nigrigenis	Black-cheeked Lovebird	VU	Botswana	Presence Uncertain	Native
	Black-cheeked Lovebird	VU	Namibia	Presence Uncertain	Native
	Black-cheeked Lovebird	VU	Zambia	Extant	Native
	Black-cheeked Lovebird	VU	Zimbabwe	Presence Uncertain	Native
Amazona agilis	Black-billed Amazon	VU	Jamaica	Extant	Native
Amazona arausiaca	Red-necked Amazon	VU	Dominica	Extant	Native
Amazona auropalliata	Yellow-naped Amazon	VU	Belize	Extant	Vagrant
	Yellow-naped Amazon	VU	Costa Rica	Extant	Native
	Yellow-naped Amazon	VU	El Salvador	Extant	Native
	Yellow-naped Amazon	VU	Guatemala	Extant	Native
	Yellow-naped Amazon	VU	Honduras	Extant	Native
	Yellow-naped Amazon	VU	Mexico	Extant	Native
	Yellow-naped Amazon	VU	Nicaragua	Extant	Native
Amazona barbadensis	Yellow-shouldered Amazon	VU	Aruba	Extinct Post-1500	Native
	Yellow-shouldered Amazon	VU	Bonaire	Extant	Native
	Yellow-shouldered Amazon	VU	Curaçao	Extinct Post-1500	Native
	Yellow-shouldered Amazon	VU	Netherlands Antilles	Extant	Native
	Yellow-shouldered Amazon	VU	Venezuela, Bolivarian Republic of	Extant	Native
Amazona brasiliensis	Red-tailed Amazon	VU	Brazil	Extant	Native
Amazona collaria	Yellow-billed Amazon	VU	Jamaica	Extant	Native
Amazona diadema	Diademed Amazon	EN	Brazil	Extant	Native
Amazona finschi	Lilac-crowned Amazon	EN	Mexico	Extant	Native
Amazona guildingii	St Vincent Amazon	VU	Saint Vincent and the Grenadines	Extant	Native
Amazona imperialis	Imperial Amazon	EN	Dominica	Extant	Native
Amazona lilacina	Lilacine Amazon	EN	Ecuador	Extant	Native
Amazona martinicana	Martinique Amazon	EX	Martinique	Extinct Post-1500	Native
Amazona oratrix	Yellow-headed Amazon	EN	Belize	Extant	Native
	Yellow-headed Amazon	EN	Guatemala	Extant	Native
	Yellow-headed Amazon	EN	Mexico	Extant	Native
Amazona pretrei	Red-spectacled Amazon	VU	Argentina	Extant	Vagrant
Amazona pretrei	Red-spectacled Amazon	VU	Brazil	Extant	Native
Amazona pretrei	Red-spectacled Amazon	VU	Paraguay	Extant	Native
Amazona rhodocorytha	Red-browed Amazon	EN	Brazil	Extant	Native
Amazona tucumana	Tucuman Amazon	VU	Argentina	Extant	Native
	Tucuman Amazon	VU	Bolivia, Plurinational States of	Extant	Native
Amazona ventralis	Hispaniolan Amazon	VU	Dominican Republic	Extant	Native
	Hispaniolan Amazon	VU	Haiti	Extant	Native
	Hispaniolan Amazon	VU	Puerto Rico	Extant	Introduced
	Hispaniolan Amazon	VU	Virgin Islands, British	Extant	Introduced
	Hispaniolan Amazon	VU	Virgin Islands, U.S.	Extant	Introduced
Amazona versicolor	St Lucia Amazon	VU	Saint Lucia	Extant	Native
Amazona vinacea	Vinaceous-breasted Amazon	EN	Argentina	Extant	Native
	Vinaceous-breasted Amazon	EN	Brazil	Extant	Native
	Vinaceous-breasted Amazon	EN	Paraguay	Extant	Native
Amazona violacea	Guadeloupe Amazon	EX	Guadeloupe	Extinct Post-1500	Native
Amazona viridigenalis	Red-crowned Amazon	EN	Mexico	Extant	Native
Amazona viridigenalis	Red-crowned Amazon	EN	Puerto Rico	Extant	Introduced
Amazona viridigenalis	Red-crowned Amazon	EN	United States	Extant	Introduced
Amazona vittata	Puerto Rican Amazon	CR	Puerto Rico	Extant	Native
Anodorhynchus glaucus	Glaucous Macaw	CR	Argentina	Extant	Native
	Glaucous Macaw	CR	Brazil	Extant	Native
	Glaucous Macaw	CR	Paraguay	Extant	Native
	Glaucous Macaw	CR	Uruguay	Extant	Native
Anodorhynchus hyacinthinus	Hyacinth Macaw	VU	Bolivia, Plurinational States of	Extant	Native
	Hyacinth Macaw	VU	Brazil	Extant	Native
	Hyacinth Macaw	VU	Paraguay	Extant	Native
Anodorhynchus leari	Lear's Macaw	EN	Brazil	Extant	Native
Ara ambiguus	Great Green Macaw	EN	Colombia	Extant	Native
	Great Green Macaw	EN	Costa Rica	Extant	Native
	Great Green Macaw	EN	Ecuador	Extant	Native
	Great Green Macaw	EN	Honduras	Extant	Native
	Great Green Macaw	EN	Nicaragua	Extant	Native
	Great Green Macaw	EN	Panama	Extant	Native
Ara glaucogularis	Blue-throated Macaw	CR	Bolivia, Plurinational States of	Extant	Native
Ara militaris	Military Macaw	VU	Argentina	Extant	Native
	Military Macaw	VU	Bolivia, Plurinational States of	Extant	Native
	Military Macaw	VU	Colombia	Extant	Native
	Military Macaw	VU	Ecuador	Extant	Native
	Military Macaw	VU	Mexico	Extant	Native
	Military Macaw	VU	Peru	Extant	Native
	Military Macaw	VU	Venezuela, Bolivarian Republic of	Extant	Native
Ara rubrogenys	Red-fronted Macaw	EN	Bolivia, Plurinational States of	Extant	Native
Ara tricolor	Cuban Macaw	EX	Cuba	Extinct Post-1500	Native
	Cuban Macaw	EX	Dominican Republic	Extinct Post-1500	Native
	Cuban Macaw	EX	Haiti	Extinct Post-1500	Native
Aratinga solstitialis	Sun Parakeet	EN	Brazil	Extant	Native
	Sun Parakeet	EN	French Guiana	Presence Uncertain	Native
	Sun Parakeet	EN	Guyana	Extant	Native
	Sun Parakeet	EN	Suriname	Presence Uncertain	Native
	Sun Parakeet	EN	Venezuela, Bolivarian Republic of	Presence Uncertain	Native
Bolborhynchus ferrugineifrons	Rufous-fronted Parakeet	VU	Colombia	Extant	Native
Brotogeris pyrrhoptera	Grey-cheeked Parakeet	EN	Ecuador	Extant	Native
	Grey-cheeked Parakeet	EN	Peru	Extant	Native
Cacatua alba	White Cockatoo	EN	Indonesia	Extant	Native
Cacatua haematuropygia	Philippine Cockatoo	CR	Philippines	Extant	Native
Cacatua moluccensis	Salmon-crested Cockatoo	VU	Indonesia	Extant	Native
Cacatua ophthalmica	Blue-eyed Cockatoo	VU	Papua New Guinea	Extant	Native
Cacatua sulphurea	Yellow-crested Cockatoo	CR	Indonesia	Extant	Native
Cacatua sulphurea	Yellow-crested Cockatoo	CR	Singapore	Extant	Introduced
Cacatua sulphurea	Yellow-crested Cockatoo	CR	Timor-Leste	Extant	Native
Charmosyna amabilis	Red-throated Lorikeet	CR	Fiji	Extant	Native
Charmosyna diadema	New Caledonian Lorikeet	CR	New Caledonia	Extant	Native
Charmosyna palmarum	Palm Lorikeet	VU	Solomon Islands	Extant	Native
Charmosyna palmarum	Palm Lorikeet	VU	Vanuatu	Extant	Native
Charmosyna toxopei	Blue-fronted Lorikeet	CR	Indonesia	Extant	Native
Conuropsis carolinensis	Carolina Parakeet	EX	United States	Extinct Post-1500	Native
Coracopsis barklyi	Seychelles Parrot	VU	Seychelles	Extant	Native
Cyanopsitta spixii	Spix's Macaw	CR (PW)	Brazil	Possibly Extinct	Native
Cyanoramphus forbesi	Chatham Parakeet	EN	New Zealand	Extant	Native
Cyanoramphus malherbi	Malherbe's Parakeet	CR	New Zealand	Extant	Native
Cyanoramphus ulietanus	Raiatea Parakeet	EX	French Polynesia	Extinct Post-1500	Native
Cyanoramphus unicolor	Antipodes Parakeet	VU	New Zealand	Extant	Native
Cyanoramphus zealandicus	Black-fronted Parakeet	EX	French Polynesia	Extinct Post-1500	Native
Cyclopsitta coxeni	Coxen's Fig-parrot	CR	Australia	Extant	Native
Eclectus infectus	Oceanic Parrot	EX	Tonga	Extinct Post-1500	Native
Eos cyanogenia	Black-winged Lory	VU	Indonesia	Extant	Native
Eos histrio	Red-and-blue Lory	EN	Indonesia	Extant	Native
Eunymphicus cornutus	Horned Parakeet	VU	New Caledonia	Extant	Native
Eunymphicus uvaeensis	Ouvea Parakeet	EN	New Caledonia	Extant	Native
Forpus xanthops	Yellow-faced Parrotlet	VU	Peru	Extant	Native
Guaruba guarouba	Golden Parakeet	VU	Brazil	Extant	Native
Hapalopsittaca amazonina	Rusty-faced Parrot	VU	Colombia	Extant	Native
Hapalopsittaca amazonina	Rusty-faced Parrot	VU	Ecuador	Presence Uncertain	Native
Hapalopsittaca amazonina	Rusty-faced Parrot	VU	Venezuela, Bolivarian Republic of	Extant	Native
Hapalopsittaca fuertesi	Indigo-winged Parrot	CR	Colombia	Extant	Native
Hapalopsittaca pyrrhops	Red-faced Parrot	VU	Ecuador	Extant	Native
Hapalopsittaca pyrrhops	Red-faced Parrot	VU	Peru	Extant	Native
Lathamus discolor	Swift Parrot	EN	Australia	Extant	Native
Leptosittaca branickii	Golden-plumed Parakeet	VU	Colombia	Extant	Native
Leptosittaca branickii	Golden-plumed Parakeet	VU	Ecuador	Extant	Native
Leptosittaca branickii	Golden-plumed Parakeet	VU	Peru	Extant	Native
Lophopsittacus bensoni	Mauritius Grey Parrot	EX	Mauritius	Extinct Post-1500	Native
Lophopsittacus mauritianus	Broad-billed Parrot	EX	Mauritius	Extinct Post-1500	Native
Loriculus flosculus	Flores Hanging-parrot	EN	Indonesia	Extant	Native
Lorius domicella	Purple-naped Lory	EN	Indonesia	Extant	Native
Lorius garrulus	Chattering Lory	VU	Indonesia	Extant	Native
Mascarinus mascarin	Mascarene Parrot	EX	Réunion	Extinct Post-1500	Native
Necropsittacus rodricanus	Rodrigues Parrot	EX	Mauritius	Extinct Post-1500	Native
Neophema chrysogaster	Orange-bellied Parrot	CR	Australia	Extant	Native
Nestor meridionalis	New Zealand Kaka	EN	New Zealand	Extant	Native
Nestor notabilis	Kea	VU	New Zealand	Extant	Native
Nestor productus	Norfolk Kaka	EX	Norfolk Island	Extinct Post-1500	Native
Ognorhynchus icterotis	Yellow-eared Parrot	EN	Colombia	Extant	Native
Ognorhynchus icterotis	Yellow-eared Parrot	EN	Ecuador	Possibly Extinct	Origin Uncertain
Pezoporus occidentalis	Night Parrot	EN	Australia	Extant	Native
Pionites leucogaster	Green-thighed Parrot	EN	Brazil	Extant	Native
Pionites xanthurus	Yellow-tailed Parrot	VU	Brazil	Extant	Native
Primolius couloni	Blue-headed Macaw	VU	Bolivia, Plurinational States of	Extant	Native
Primolius couloni	Blue-headed Macaw	VU	Brazil	Extant	Native
Primolius couloni	Blue-headed Macaw	VU	Peru	Extant	Native
Prioniturus luconensis	Green Racquet-tail	EN	Philippines	Extant	Native
Prioniturus mindorensis	Mindoro Racquet-tail	VU	Philippines	Extant	Native
Prioniturus platenae	Blue-headed Racquet-tail	VU	Philippines	Extant	Native
Prioniturus verticalis	Sulu Racquet-tail	CR	Philippines	Extant	Native
Prosopeia splendens	Crimson Shining-parrot	VU	Fiji	Extant	Native
Psephotellus chrysopterygius	Golden-shouldered Parrot	EN	Australia	Extant	Native
Psephotellus pulcherrimus	Paradise Parrot	EX	Australia	Extinct Post-1500	Native
Psittacara chloropterus	Hispaniolan Parakeet	VU	Dominican Republic	Extant	Native
Psittacara chloropterus	Hispaniolan Parakeet	VU	Guadeloupe	Extant	Introduced
Psittacara chloropterus	Hispaniolan Parakeet	VU	Haiti	Extant	Native
Psittacara chloropterus	Hispaniolan Parakeet	VU	Puerto Rico	Extinct Post-1500	Native
Psittacara euops	Cuban Parakeet	VU	Cuba	Extant	Native
Psittacara labati	Guadeloupe Parakeet	EX	Guadeloupe	Extinct Post-1500	Native
Psittacula eques	Echo Parakeet	EN	Mauritius	Extant	Native
Psittacula eques	Echo Parakeet	EN	Réunion	Extinct Post-1500	Native
Psittacula exsul	Rodrigues Parakeet	EX	Mauritius	Extinct Post-1500	Native
Psittacula wardi	Seychelles Parakeet	EX	Seychelles	Extinct Post-1500	Native
Psittacus erithacus	Grey Parrot	VU	Angola	Extant	Native
	Grey Parrot	VU	Benin	Extant	Introduced
	Grey Parrot	VU	Burundi	Extant	Native
	Grey Parrot	VU	Cameroon	Extant	Native
	Grey Parrot	VU	Central African Republic	Extant	Native
	Grey Parrot	VU	Congo	Extant	Native
	Grey Parrot	VU	Congo, The Democratic Republic of the	Extant	Native
	Grey Parrot	VU	Côte d'Ivoire	Extant	Native
	Grey Parrot	VU	Equatorial Guinea	Extant	Native
	Grey Parrot	VU	Gabon	Extant	Native
	Grey Parrot	VU	Ghana	Extant	Native
	Grey Parrot	VU	Kenya	Extant	Native
	Grey Parrot	VU	Nigeria	Extant	Native
	Grey Parrot	VU	Rwanda	Extant	Native
	Grey Parrot	VU	Sao Tomé and Principe	Extant	Native
	Grey Parrot	VU	Tanzania, United Republic of	Extant	Native
	Grey Parrot	VU	Togo	Extant	Introduced
	Grey Parrot	VU	Uganda	Extant	Native
Psittacus timneh	Timneh Parrot	VU	Côte d'Ivoire	Extant	Native
Psittacus timneh	Timneh Parrot	VU	Guinea	Extant	Native
Psittacus timneh	Timneh Parrot	VU	Guinea-Bissau	Extant	Native
Psittacus timneh	Timneh Parrot	VU	Liberia	Extant	Native
Psittacus timneh	Timneh Parrot	VU	Mali	Extant	Native
Psittacus timneh	Timneh Parrot	VU	Sierra Leone	Extant	Native
Psittrichas fulgidus	Pesquet's Parrot	VU	Indonesia	Extant	Native
Psittrichas fulgidus	Pesquet's Parrot	VU	Papua New Guinea	Extant	Native
Pyrilia vulturina	Vulturine Parrot	VU	Brazil	Extant	Native
Pyrrhura albipectus	White-necked Parakeet	VU	Ecuador	Extant	Native
Pyrrhura albipectus	White-necked Parakeet	VU	Peru	Extant	Origin Uncertain
Pyrrhura amazonum	Santarem Parakeet	EN	Brazil	Extant	Native
Pyrrhura caeruleiceps	Perija Parakeet	EN	Colombia	Extant	Native
Pyrrhura caeruleiceps	Perija Parakeet	EN	Venezuela, Bolivarian Republic of	Extant	Native
Pyrrhura calliptera	Brown-breasted Parakeet	VU	Colombia	Extant	Native
Pyrrhura cruentata	Ochre-marked Parakeet	VU	Brazil	Extant	Native
Pyrrhura eisenmanni	Azuero Parakeet	EN	Panama	Extant	Native
Pyrrhura griseipectus	Grey-breasted Parakeet	CR	Brazil	Extant	Native
Pyrrhura lepida	Pearly Parakeet	VU	Brazil	Extant	Native
Pyrrhura orcesi	El Oro Parakeet	EN	Ecuador	Extant	Native
Pyrrhura perlata	Crimson-bellied Parakeet	VU	Bolivia, Plurinational States of	Extant	Native
Pyrrhura perlata	Crimson-bellied Parakeet	VU	Brazil	Extant	Native
Pyrrhura pfrimeri	Goias Parakeet	EN	Brazil	Extant	Native
Pyrrhura snethlageae	Madeira Parakeet	VU	Bolivia, Plurinational States of	Extant	Native
Pyrrhura snethlageae	Madeira Parakeet	VU	Brazil	Extant	Native
Pyrrhura subandina	Sinu Parakeet	CR (PE)	Colombia	Extant	Native
Pyrrhura viridicata	Santa Marta Parakeet	EN	Colombia	Extant	Native
Rhynchopsitta pachyrhyncha	Thick-billed Parrot	EN	Mexico	Extant	Native
Rhynchopsitta pachyrhyncha	Thick-billed Parrot	EN	United States	Extant	Reintroduced
Rhynchopsitta terrisi	Maroon-fronted Parrot	EN	Mexico	Extant	Native
Strigops habroptila	Kakapo	CR	New Zealand	Extant	Native
Tanygnathus gramineus	Black-lored Parrot	VU	Indonesia	Extant	Native
Touit costaricensis	Red-fronted Parrotlet	VU	Costa Rica	Extant	Native
Touit costaricensis	Red-fronted Parrotlet	VU	Panama	Extant	Native
Touit huetii	Scarlet-shouldered Parrotlet	VU	Bolivia, Plurinational States of	Extant	Native
	Scarlet-shouldered Parrotlet	VU	Brazil	Extant	Native
	Scarlet-shouldered Parrotlet	VU	Colombia	Extant	Native
	Scarlet-shouldered Parrotlet	VU	Ecuador	Extant	Native
	Scarlet-shouldered Parrotlet	VU	Guyana	Extant	Native
	Scarlet-shouldered Parrotlet	VU	Peru	Extant	Native
	Scarlet-shouldered Parrotlet	VU	Trinidad and Tobago	Extant	Native
	Scarlet-shouldered Parrotlet	VU	Venezuela, Bolivarian Republic of	Extant	Native
Touit melanonotus	Brown-backed Parrotlet	EN	Brazil	Extant	Native
Touit stictopterus	Spot-winged Parrotlet	VU	Colombia	Possibly Extinct	Native
	Spot-winged Parrotlet	VU	Ecuador	Extant	Native
	Spot-winged Parrotlet	VU	Peru	Extant	Native
Touit surdus	Golden-tailed Parrotlet	VU	Brazil	Extant	Native
Trichoglossus rosenbergii	Biak Lorikeet	VU	Indonesia	Extant	Native
Vini kuhlii	Rimatara Lorikeet	EN	French Polynesia	Extant	Native
Vini kuhlii	Rimatara Lorikeet	EN	Kiribati	Extant	Native
Vini peruviana	Blue Lorikeet	VU	Cook Islands	Extant	Native
Vini peruviana	Blue Lorikeet	VU	French Polynesia	Extant	Native
Vini stepheni	Henderson Lorikeet	VU	Pitcairn	Extant	Native
Vini ultramarina	Ultramarine Lorikeet	EN	French Polynesia	Extant	Native
Zanda baudinii	Long-billed Black-cockatoo	EN	Australia	Extant	Native
Zanda latirostris	Short-billed Black-cockatoo	EN	Australia	Extant	Native
